# Supplementary material for: Patient-derived xenografts and single-cell sequencing identifies three subtypes of tumor-reactive lymphocytes in uveal melanoma metastases
Source: eLife. 2024 Sep 23;12:RP91705. doi: 10.7554/eLife.91705 (PMC11419671; doi:10.7554/eLife.91705)
Supplement: Supplementary file 7. [file elife-91705-supp7.xlsx]

## Sheet: Blad1
Nat Comm/JK code	UM/44-18 code	scSeq code	Study	Treatment before biopsy	Biopsy site
UM26	4418-9-PR-UM190104	A6+A8	PEMDAC	Chemotherapy, PD1 plus entinostat	Subcutaneous
UM7	(U)M12X213B	B9C1	None	Chemotherapy	Subcutaneous
UM46	4418-7-PR	A2	PEMDAC	Chemotherapy, PD1 plus entinostat	Subcutaneous
UM1	UM17X208-PR	D4	None	Untreated, surgery but no perfusion because of complications	Liver
UM3	UM17X830	B3-GEX	SCANDIUM	Untreated, surgery before perfusion	Liver
UM25	UM151X05	C3CY-GEX	SCANDIUM	Untreated, surgery before perfusion	Liver
UM24	UM17X921	C5-GEX	SCANDIUM	Untreated, surgery before perfusion	Liver
UM9	UM16X411	C7-GEX	SCANDIUM	Untreated, surgery before perfusion	Liver
UM21	UM16X620	C8-GEX	SCANDIUM	Untreated, surgery before perfusion	Liver
UM19	UM16X219	D2-GEX	SCANDIUM	Untreated, surgery before perfusion	Liver
UM2	UM17X424	D6-GEX	SCANDIUM	Untreated, surgery before perfusion	Liver
UM29	UM18X128	D9-GEX	SCANDIUM	Untreated, surgery before perfusion	Liver
UM30	UM19X114	E5-GEX	SCANDIUM	Untreated, surgery before perfusion	Liver
UM63	UM18X507-PIER	B6	SCANDIUM	Untreated, surgery before perfusion	Liver
